# Supplementary material
Source: Research Square preprint supplement (doi:10.21203/rs.3.rs-8928345/v1)
Supplement: Supplementary file 1 [file accef761db7cffd8ba66432f.docx]

# SUPPLEMENTARY MATERIAL

**
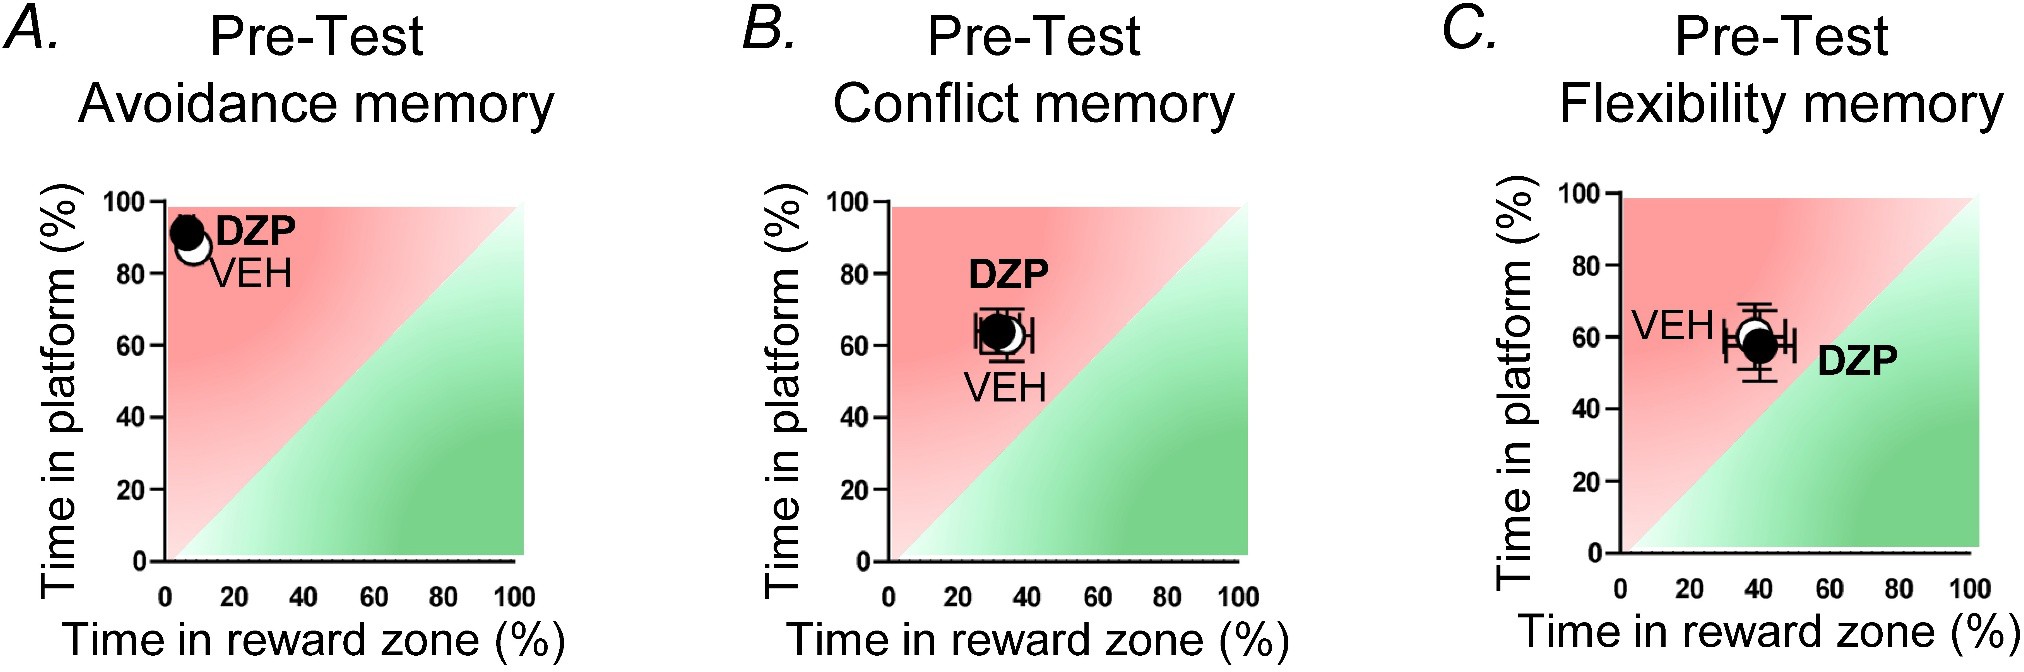
**

**Fig. S1 The pre-test balance indices were comparable between the groups.** Pre-test avoidance/approach balance indices prior to the (A) avoidance memory test (vehicle, n

= 16; diazepam, n = 16), (B) conflict memory test (vehicle, n = 16; diazepam, n = 16), and

(C) flexibility memory test (vehicle, n = 12; diazepam, n = 12). Data are presented as mean

± SEM with individual data points.


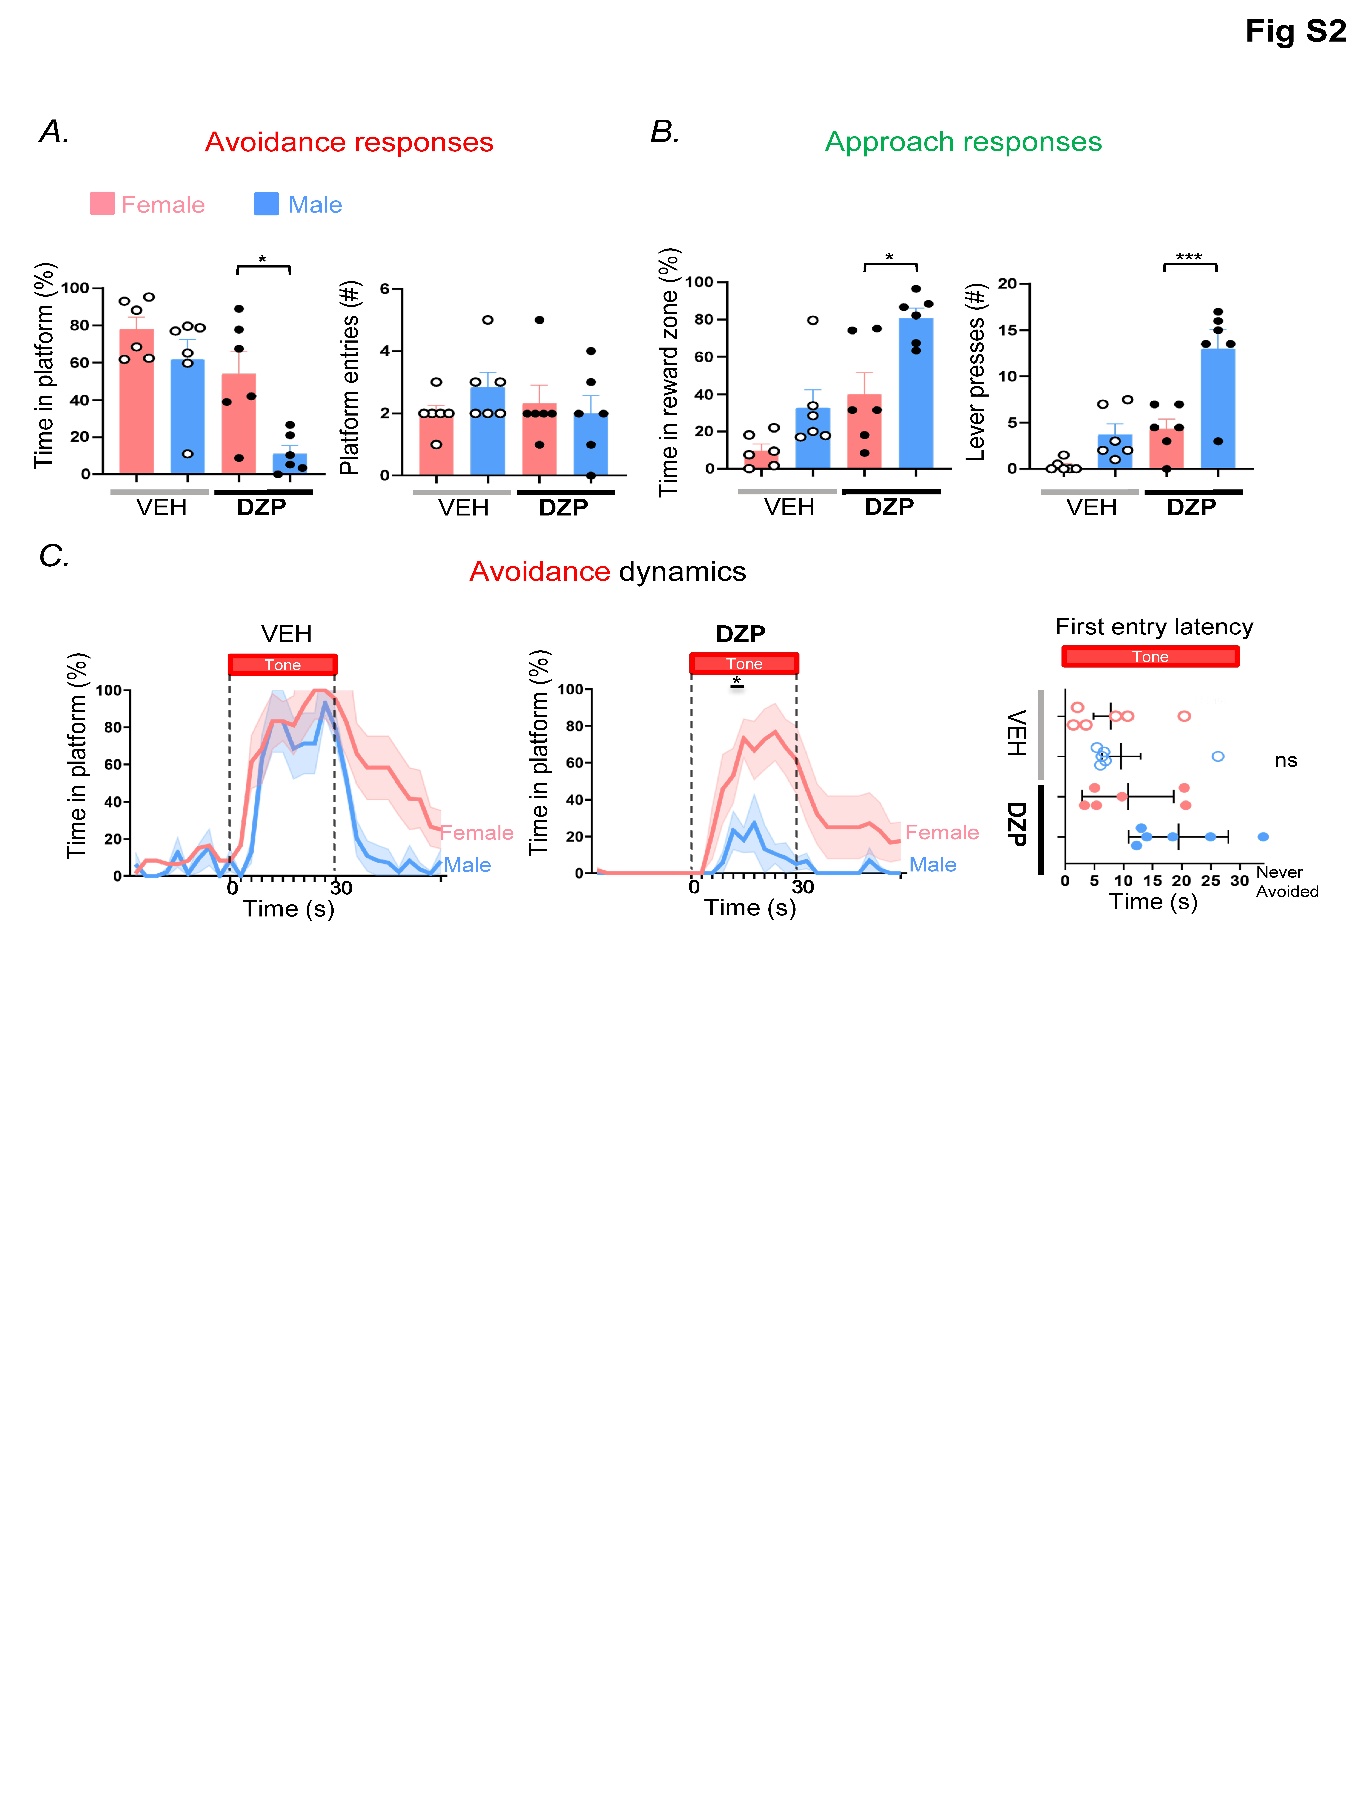


**Fig. S2 Sex-disaggregated behavioral measures and avoidance dynamics.** Sex-disaggregated avoidance and approach measures underlying the balance index during the flexibility memory test (vehicle: females, n = 6; males, n = 6; diazepam: females, n = 6; males, n = 6). (A) Avoidance responses (platform time and platform entries). (B) Approach responses (reward zone time and lever presses). (C) Avoidance dynamics during tone presentation shown separately by sex for vehicle- and diazepam-treated rats, with latency to the first platform entry shown on the right**.** Data are presented as mean ± SEM with individual data points shown. *p < 0.05, ***p < 0.001.
